# Supplementary material for: Liquid phase separation in undercooled Cu-based alloys
Source: Royal Society of Chemistry journal article supplement (doi:10.1039/c5cp00958h), 2004-01-01
Supplement: c5cp00958h1.pdf [file c5cp00958h1.pdf]

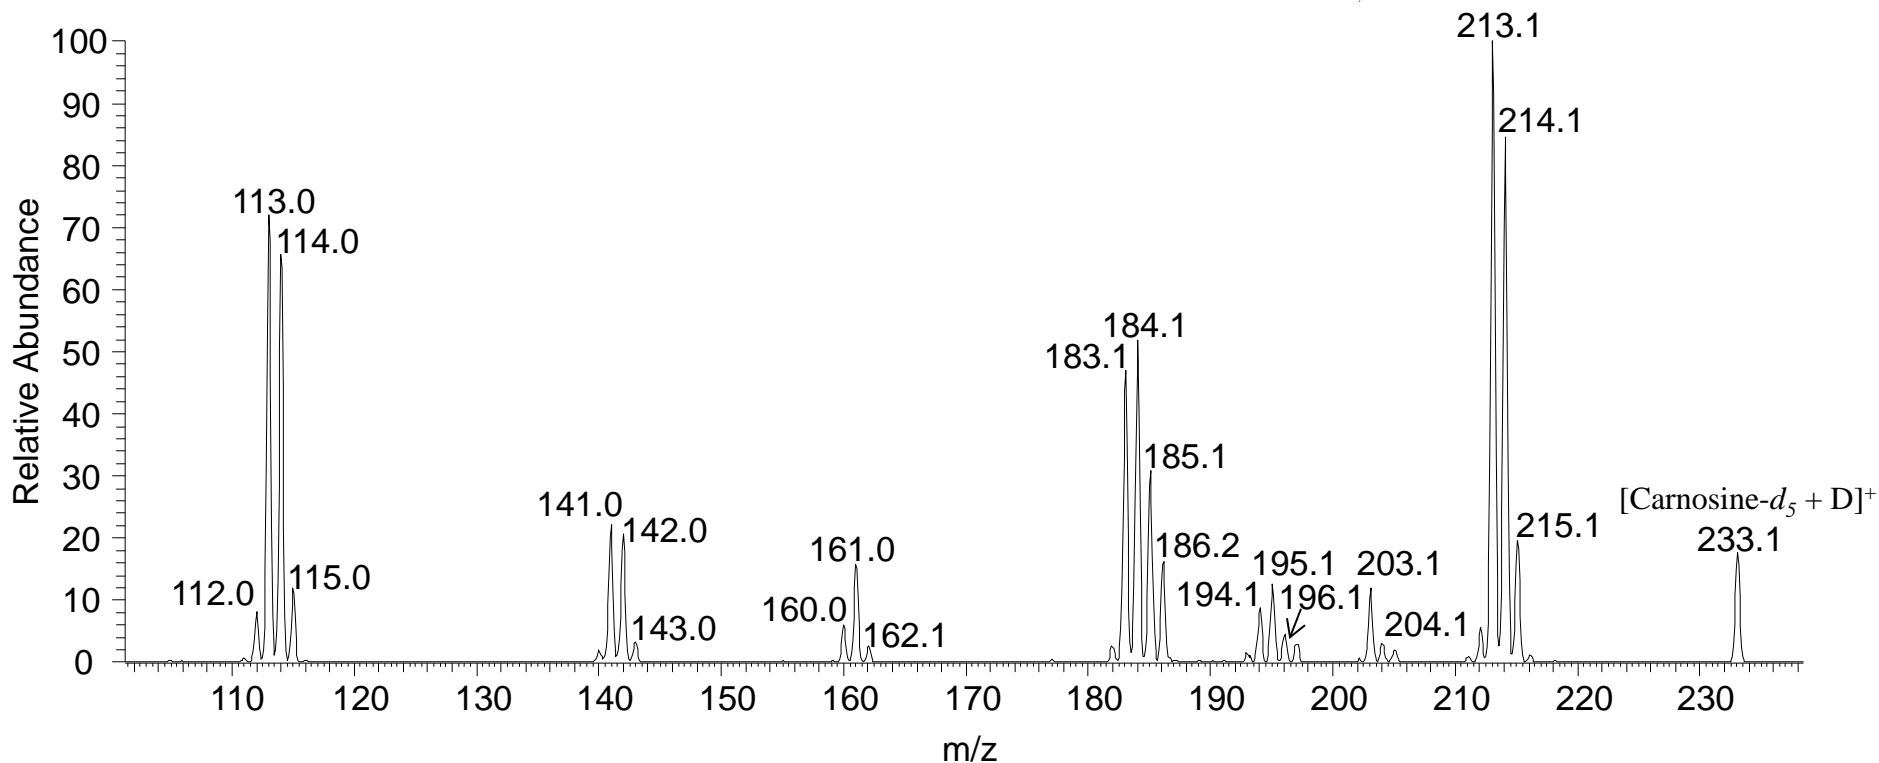

Figure S1: MS<sup>2</sup> spectrum of the ion [Carnosine- $d_5 + D$ ]<sup>+</sup> generated at 25 eV in the lab frame produced from a 1mM of Carnosine in a (1:1) (v/v) D<sub>2</sub>O/MeOD solution without allowing for incubation time.

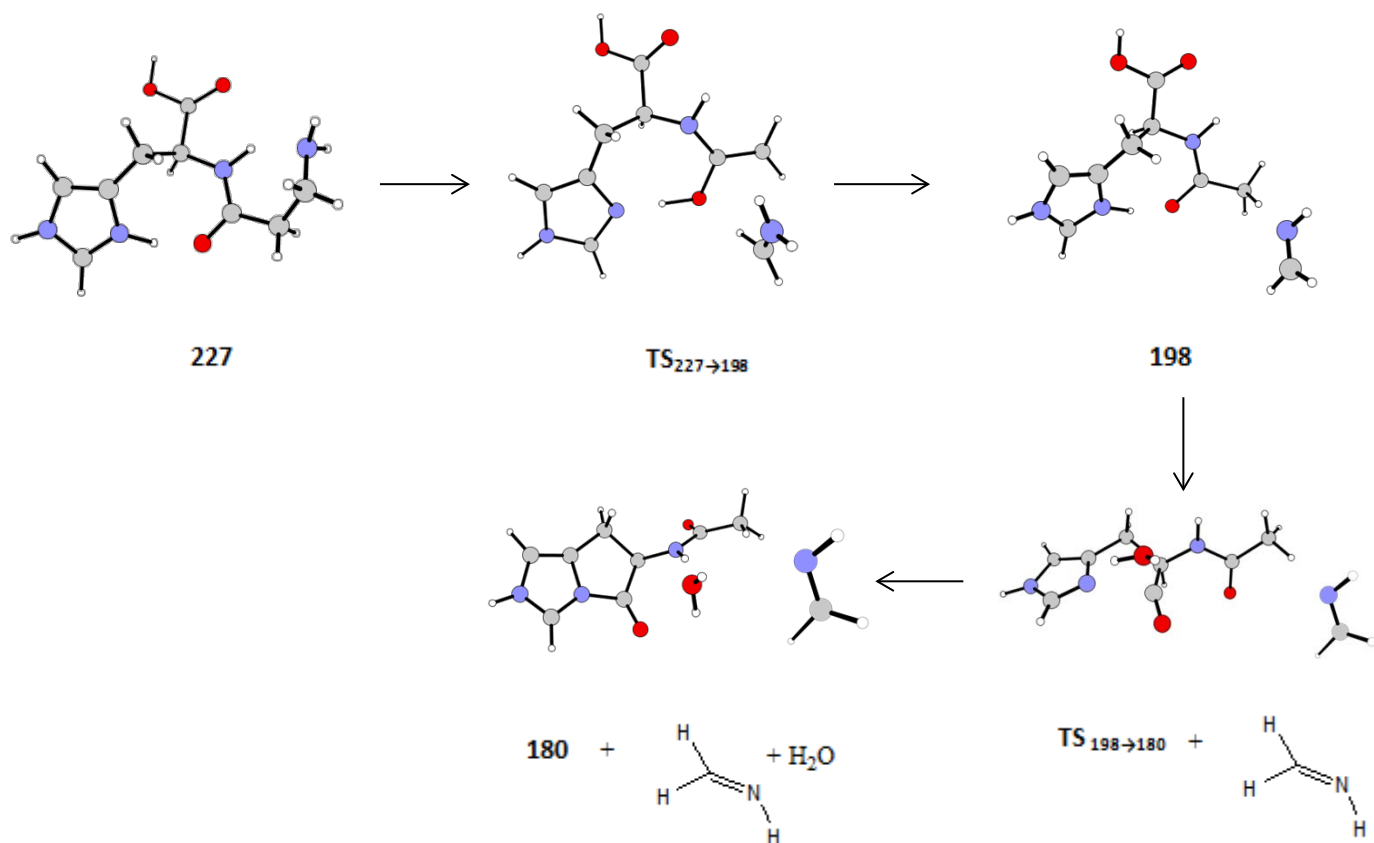

Figure S2: Proposed mechanism for the collision induced fragmentation of [Carnosine + H]<sup>+</sup> to produce the fragments observed at m/z 198 and 180. Gaussian output files from the B3LYP/6-311++G(d,p) calculations are depicted. The colors grey, white, red and blue refer to carbon, hydrogen, oxygen and nitrogen atoms respectively

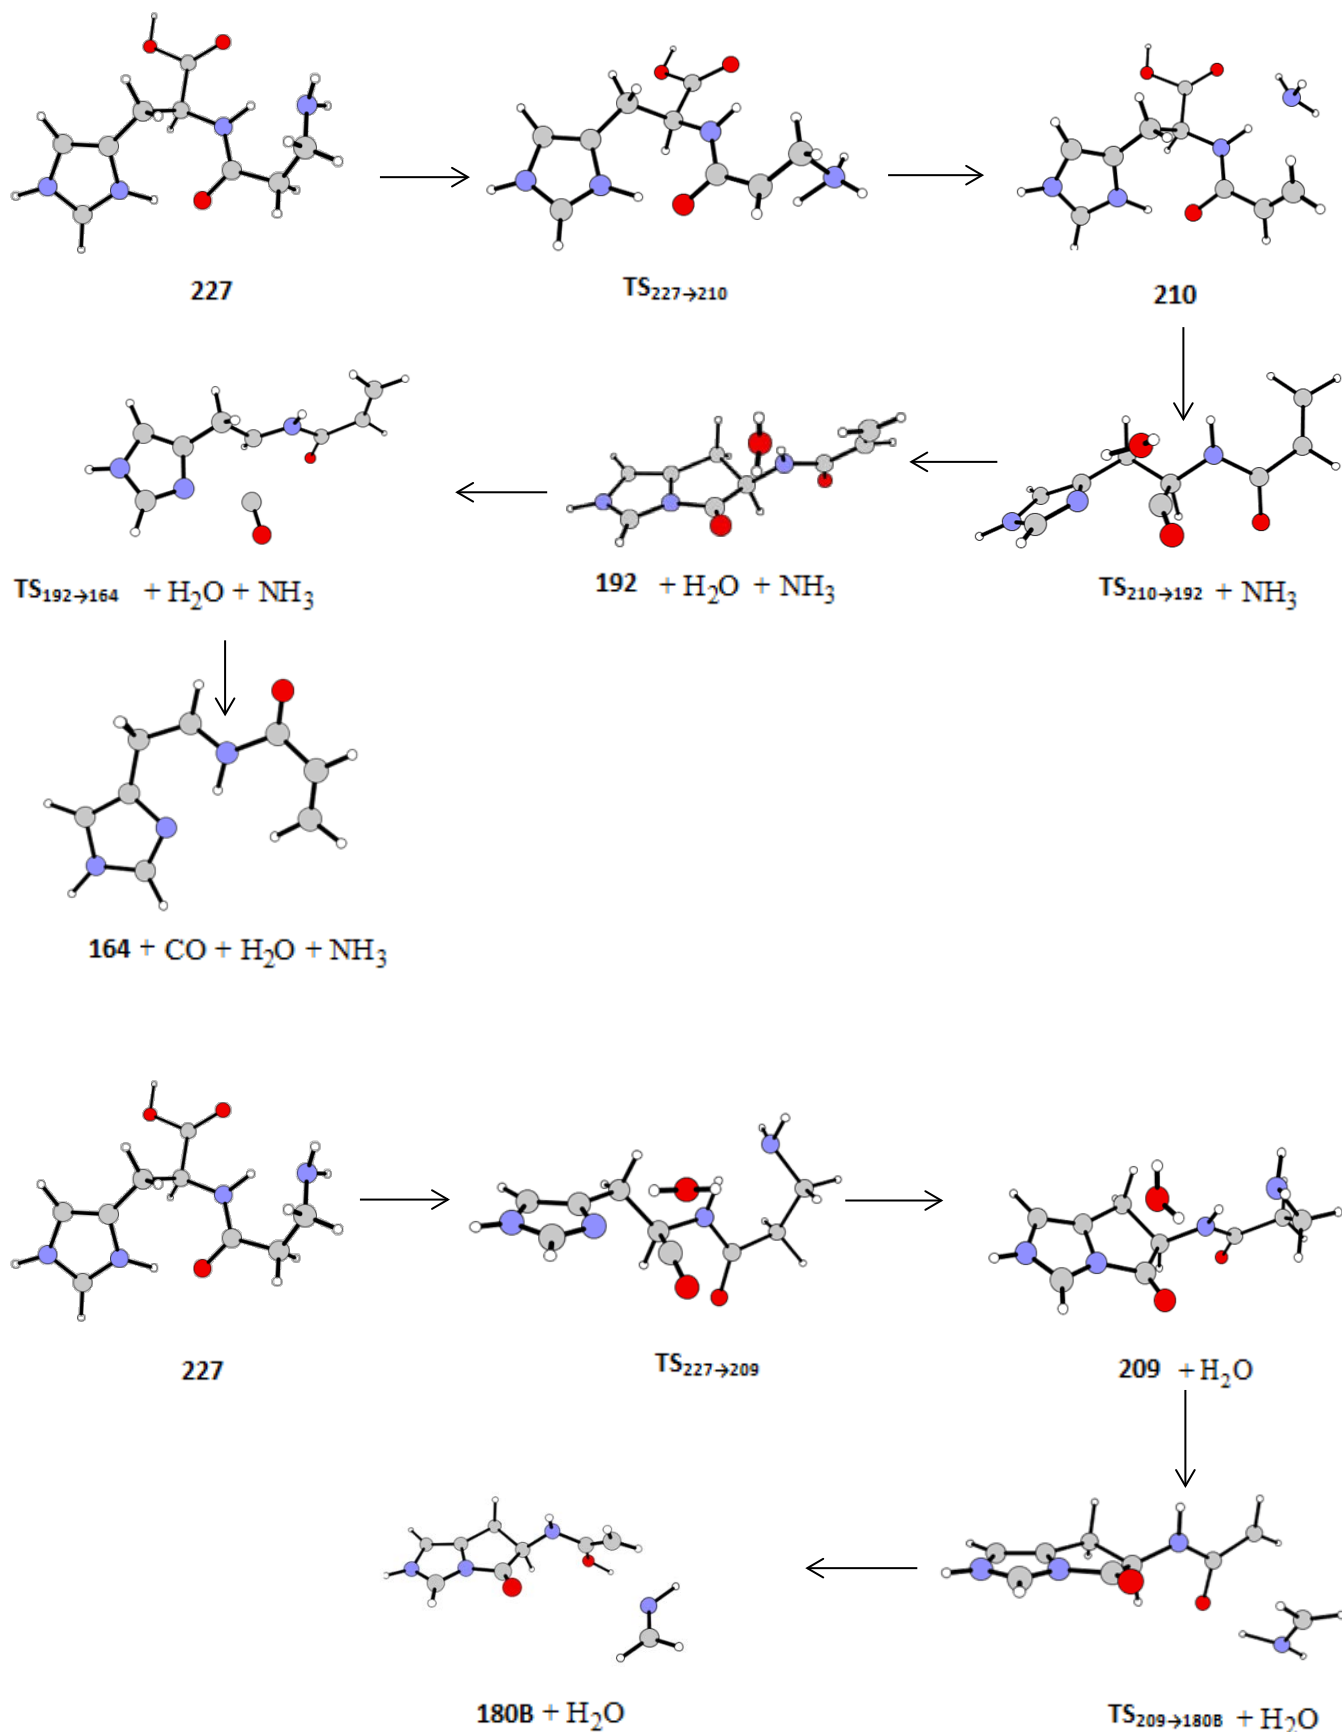

Figure S3: Proposed mechanism for the collision induced fragmentation of [Carnosine + H]<sup>+</sup> to produce the fragments observed at m/z 210, 192 and 164. Gaussian output files from the B3LYP/6-311++G(d,p) calculations are depicted. The colors grey, white, red and blue refer to carbon, hydrogen, oxygen and nitrogen atoms respectively.

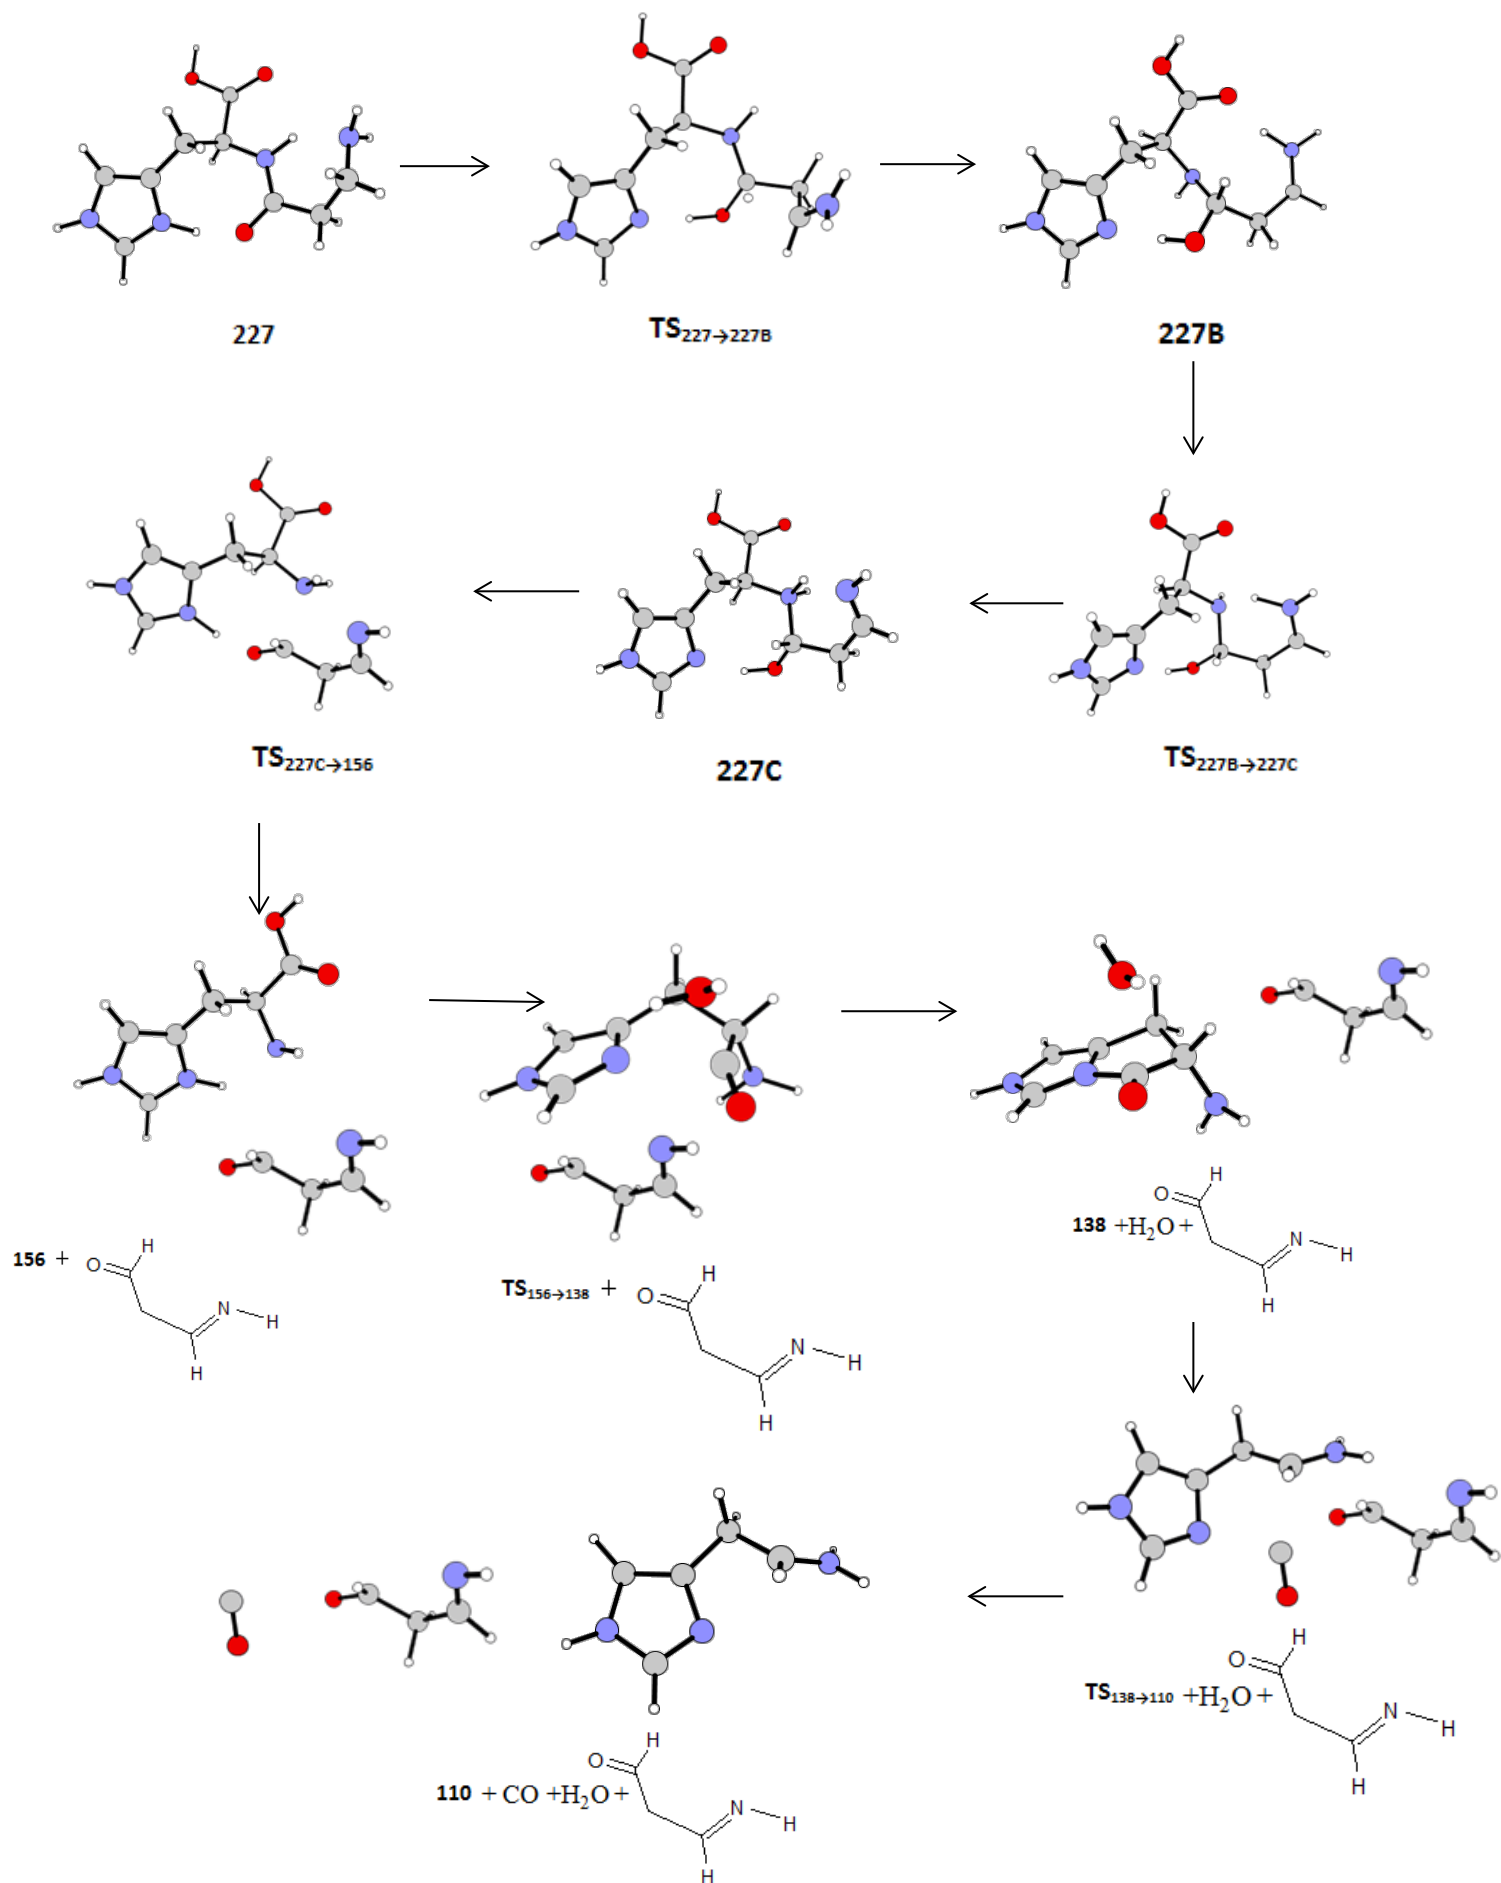

Figure S4: Proposed mechanism for the collision induced fragmentation of [Carnosine + H]<sup>+</sup> to produce the fragment ion observed at m/z 156, 138 and 110. Gaussian output files from the B3LYP/6-311++G(d,p) calculations are depicted. The colors grey, white, red and blue refer to carbon, hydrogen, oxygen and nitrogen atoms respectively

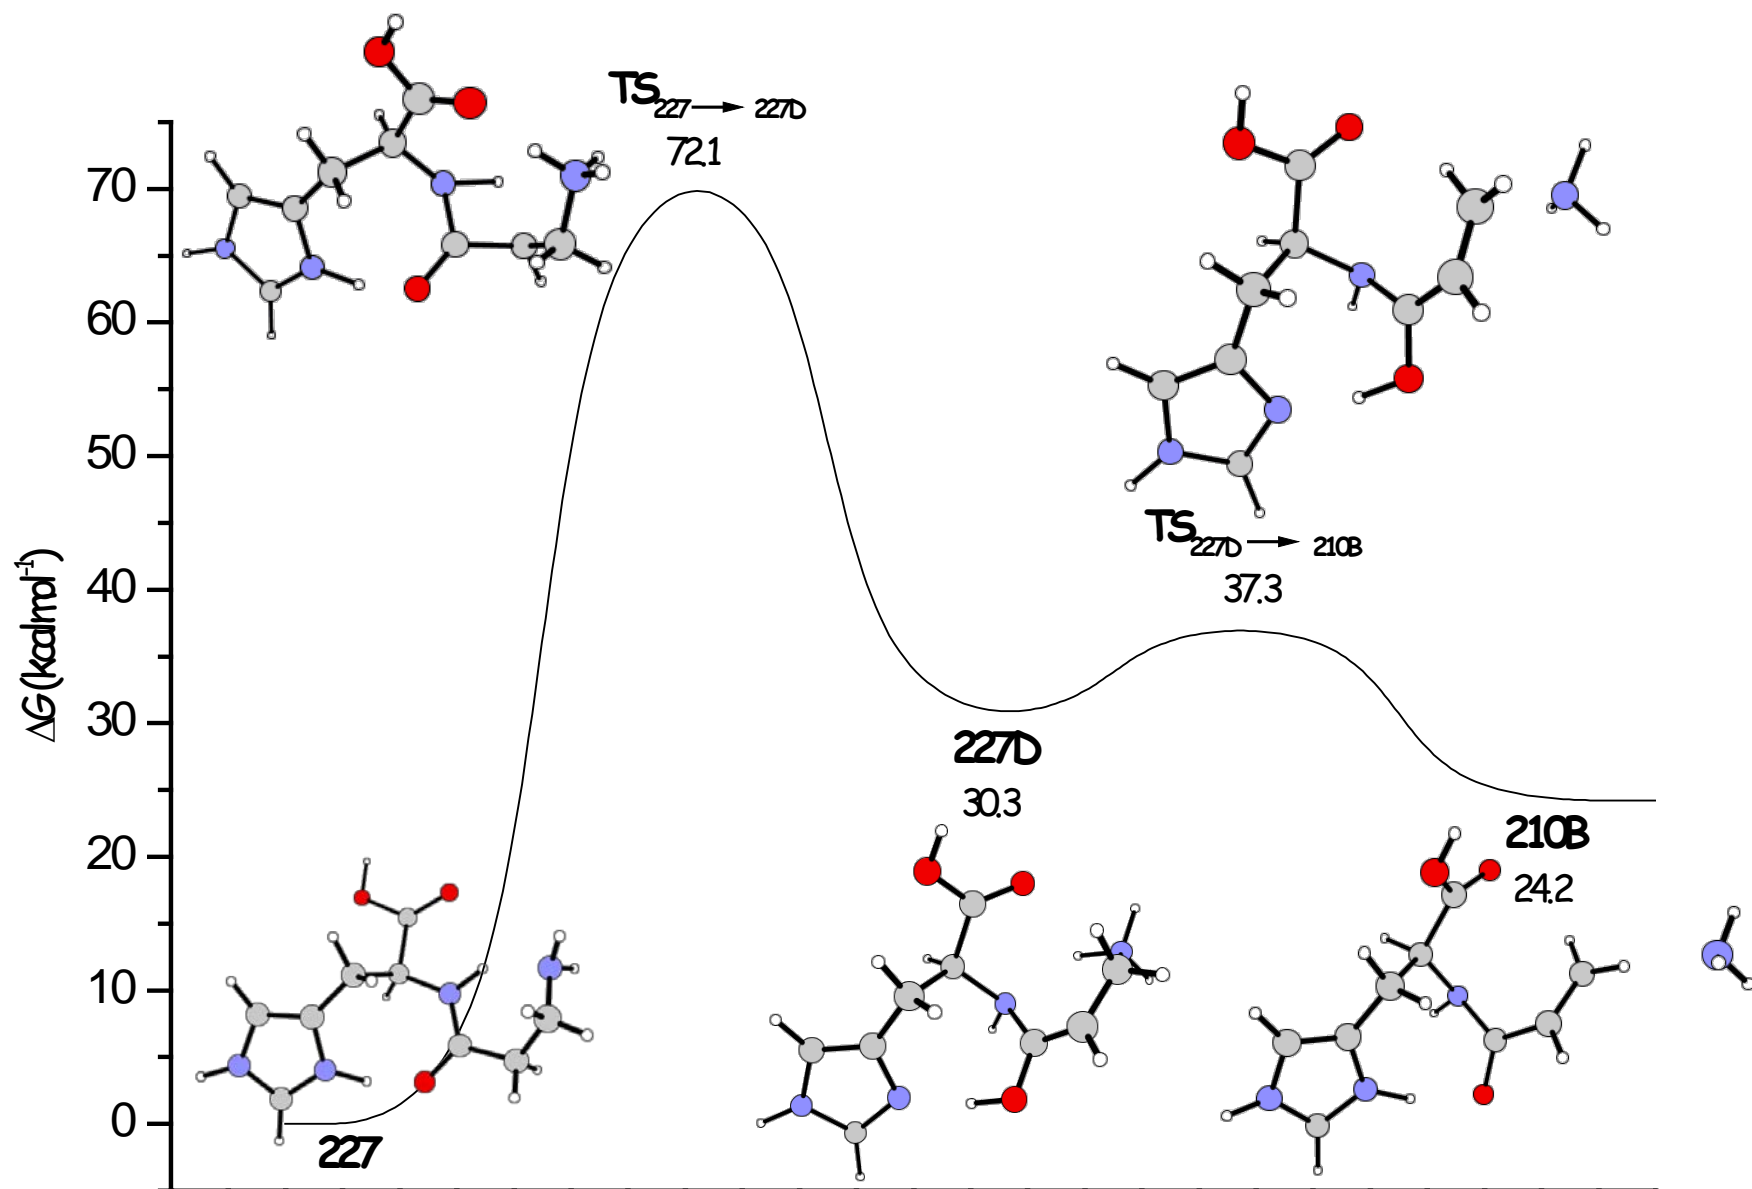

Figure S5: B3LYP free energy profile for an alternative fragmentation mechanism of  $[\text{Carnosine} + \text{H}]^+$  to give the ion at  $m/z$  210. Relative free energies at 298 K are in  $\text{kcal mol}^{-1}$  and calculated with respect to the most stable conformer, **227**, of protonated carnosine.

Table S1: Electronic energies, Zero-Point Vibrational Energies, Thermal Energies, Entropies and relative free energies for species calculated at B3LYP/6-311++G(d,p).

| Structure         | Electronic energy (Hartrees) | ZPE (kcal mol <sup>-1</sup> ) | $H_{298}^{\circ} - H_0^{\circ}$ (kcal mol <sup>-1</sup> ) | Entropy (cal mol <sup>-1</sup> K <sup>-1</sup> ) | Relative free energy at 298 K (kcal mol <sup>-1</sup> ) |
|-------------------|------------------------------|-------------------------------|-----------------------------------------------------------|--------------------------------------------------|---------------------------------------------------------|
| <b>227</b>        | -796.7420143                 | 161.7                         | 10.2                                                      | 127.3                                            | 0.0                                                     |
| <b>TS227to198</b> | -796.6543187                 | 158.7                         | 11.1                                                      | 137.9                                            | 49.7                                                    |
| <b>198</b>        | -796.7143147                 | 158.0                         | 12.0                                                      | 149.2                                            | 8.8                                                     |
| <b>TS198to180</b> | -796.6280855                 | 154.1                         | 12.1                                                      | 177.0                                            | 51.0                                                    |
| <b>180</b>        | -796.66763                   | 155.0                         | 12.6                                                      | 184.7                                            | 25.2                                                    |

Table S2: Electronic energies, Zero-Point Vibrational Energies, Thermal Energies, Entropies and relative free energies for species calculated at B3LYP/6-311++G(d,p).

| Structure         | Electronic energy (Hartrees) | ZPE (kcal mol <sup>-1</sup> ) | $H_{298}^{\circ} - H_0^{\circ}$ (kcal mol <sup>-1</sup> ) | Entropy (cal mol <sup>-1</sup> K <sup>-1</sup> ) | Relative free energy at 298 K (kcal mol <sup>-1</sup> ) |
|-------------------|------------------------------|-------------------------------|-----------------------------------------------------------|--------------------------------------------------|---------------------------------------------------------|
| <b>227</b>        | -796.7420143                 | 161.7                         | 10.2                                                      | 127.3                                            | 0.0                                                     |
| <b>TS227to210</b> | -796.6614534                 | 157.9                         | 10.1                                                      | 125.2                                            | 47.1                                                    |
| <b>210</b>        | -796.7265001                 | 158.9                         | 11.6                                                      | 138.3                                            | 5.0                                                     |
| <b>TS210to192</b> | -796.6353449                 | 154.1                         | 12.5                                                      | 170.4                                            | 48.7                                                    |
| <b>192</b>        | -796.6738943                 | 154.9                         | 12.9                                                      | 177.3                                            | 23.7                                                    |
| <b>TS192to164</b> | -796.609968                  | 150.4                         | 13.8                                                      | 210.7                                            | 50.3                                                    |
| <b>164</b>        | -796.6354981                 | 148.7                         | 14.5                                                      | 245.6                                            | 22.7                                                    |

Table S3: Electronic energies, Zero-Point Vibrational Energies, Thermal Energies, Entropies and relative free energies for species calculated at B3LYP/6-311++G(d,p).

| Structure          | Electronic energy (Hartrees) | ZPE (kcal mol <sup>-1</sup> ) | $H_{298}^{\circ} - H_0^{\circ}$ (kcal mol <sup>-1</sup> ) | Entropy (cal mol <sup>-1</sup> K <sup>-1</sup> ) | Relative free energy at 298 K (kcal mol <sup>-1</sup> ) |
|--------------------|------------------------------|-------------------------------|-----------------------------------------------------------|--------------------------------------------------|---------------------------------------------------------|
| <b>227</b>         | -796.7420143                 | 161.7                         | 10.2                                                      | 127.3                                            | 0.0                                                     |
| <b>TS227to209</b>  | -796.6678158                 | 158.8                         | 10.9                                                      | 131.6                                            | 43.0                                                    |
| <b>209</b>         | -796.6678158                 | 159.5                         | 11.6                                                      | 138.2                                            | 20.7                                                    |
| <b>TS209to180B</b> | -796.6099956                 | 152.8                         | 11.9                                                      | 167.2                                            | 63.6                                                    |
| <b>180B</b>        | -796.6090982                 | 153.2                         | 12.6                                                      | 207.4                                            | 53.4                                                    |



Table S4: Electronic energies, Zero-Point Vibrational Energies, Thermal Energies, Entropies and relative free energies for species calculated at B3LYP/6-311++G(d,p).

| Structure    | Electronic energy (Hartrees) | ZPE (kcal mol <sup>-1</sup> ) | $H_{298}^{\circ} - H_0^{\circ}$ (kcal mol <sup>-1</sup> ) | Entropy (cal mol <sup>-1</sup> K <sup>-1</sup> ) | Relative free energy at 298 K (kcal mol <sup>-1</sup> ) |
|--------------|------------------------------|-------------------------------|-----------------------------------------------------------|--------------------------------------------------|---------------------------------------------------------|
| <b>227</b>   | -796.7420143                 | 161.7                         | 10.2                                                      | 127.3                                            | 0.0                                                     |
| TS227to227B  | -796.6448864                 | 158.3                         | 10.1                                                      | 126.2                                            | 57.7                                                    |
| <b>227B</b>  | -796.6970513                 | 161.4                         | 10.1                                                      | 126.4                                            | 28.1                                                    |
| TS227Bto227C | -796.6891332                 | 158.4                         | 10.9                                                      | 130.9                                            | 31.4                                                    |
| <b>227C</b>  | -796.6993917                 | 162.4                         | 10.1                                                      | 125.4                                            | 27.8                                                    |
| TS227Cto156  | -796.680308                  | 158.9                         | 10.2                                                      | 127.0                                            | 36.0                                                    |
| <b>156</b>   | -796.6731828                 | 158.2                         | 11.0                                                      | 175.0                                            | 26.1                                                    |
| TS156to138   | -796.6063602                 | 154.8                         | 11.5                                                      | 176.3                                            | 64.9                                                    |
| <b>138</b>   | -796.6414835                 | 155.4                         | 12.3                                                      | 184.6                                            | 41.7                                                    |
| TS138to110   | -796.590918                  | 151.6                         | 12.8                                                      | 214.8                                            | 61.2                                                    |
| <b>110</b>   | -796.619971                  | 149.7                         | 13.6                                                      | 251.1                                            | 30.8                                                    |
